# Supplementary material
Source: publisher figshare collection journal article supplement (https://gsajournals.figshare.com/ndownloader/files/13390400)
Supplement: Supplementary file 1 [file 13390400]

## Sheet: Sheet1
Table S2. Genes enriched and depleted in individual MB classes and subtypes.
GroupType	Group	Direction	Genes
class	γ	enriched	ab, CG10019, CG10096, CG10097, CG13055, CG13743, CG17193, CG3009, CG32137, CG32204, CG32647, CG32698, CG33098, CG33934, CG34402, CG40198, CG40228, CG42655, CG43902, CG43980, CG44088, CG5897, CG8765, CG8861, cmet, Cyp9f3, dan, DIP-gamma, dlp, ed, fru, Gfat1, GstD11, hec, her, Imp, Indy-2, ItgaPS4, klg, kuz, Lgr3, Obp56a, Sgs4, SIFaR, TkR86C, Toll-6, tyn
class	γ	depleted	Apoltp, beat-VII, Cfp1, CG15431, CG31814, CG33144, CG33475, CG46339, CG6044, CG7311, dati, DOR, dpr6, Dyb, Ext2, GlcAT-P, Hs3st-A, Mct1, Pvf3, SmydA-8, Syt12, Tb
class	α′/β′	enriched	AANATL2, AcCoAS, Ace, app, ATP8B, beat-IV, boil, Ccn, CG11362, CG12355, CG13325, CG1358, CG13594, CG14823, CG15522, CG15539, CG17364, CG18265, CG30158, CG31371, CG32814, CG33284, CG34030, CG34041, CG3655, CG42322, CG42594, CG43732, CG43742, CG43938, CG4582, CG4829, CG6034, CG7768, CG8641, Cyp4p1, Cyp4p3, Cyp6a2, DAT, Ddr, dnr1, dpr17, drl, Epac, eys, Fili, fz3, His1:CG31617, His1:CG33813, hppy, i…
class	α′/β′	depleted	ATPsynCF6L, bma, bol, bru1, bru2, Bx, CG11768, CG12541, CG12640, CG15097, CG15803, CG17010, CG30325, CG31760, CG32066, CG32148, CG32683, CG34135, CG34354, CG34357, CG34384, CG34425, CG3625, CG42302, CG42329, CG42492, CG43445, CG4577, CG46244, CG9171, CrebA, cwo, Dgk, Fas2, frtz, GluClalpha, hoe1, KCNQ, Mef2, mld, Mur82C, numb, Oamb, ome, Ppa, Rbp, sNPF, SPR, sprt, Sytalpha, Sytbeta, unc-5, Vsx1, …
class	α/β	enriched	2mit, 5-HT1A, br, Ca-alpha1T, CG10738, CG11226, CG11319, CG11406, CG11883, CG12910, CG14811, CG2865, CG2898, CG3088, CG31475, CG31637, CG32066, CG3222, CG32547, CG32982, CG33090, CG34273, CG42541, CG42784, CG43078, CG43373, CG43729, CG43737, CG43759, CG43843, CG4404, CG4502, CG45263, CG4577, CG46310, CG6006, CG8500, CG9932, crb, Cyp313a1, Dh44-R1, dpr3, Eip93F, Esyt2, fu12, Gyc88E, Ir56a, Irk1, I…
class	α/β	depleted	Adhr, ATP8B, Calx, CG10019, CG10384, CG11068, CG11322, CG13252, CG13300, CG13579, CG13995, CG14441, CG14669, CG30345, CG31785, CG31910, CG32333, CG3358, CG33912, CG34260, CG34370, CG42342, CG42788, CG42817, CG43366, CG43446, CG6231, CG8034, CG8757, cmpy, Cngl, cno, Cyp6a2, Dat, dpr15, dpr16, dpr8, Epac, Gr77a, GstD11, Imp, klar, mamo, mGluR, Mical, mtt, Muc91C, nAChRalpha6, nAChRalpha7, Or65c, os…
subtype	γd	enriched	CG13606, CG30440, CG44422
subtype	γd	depleted	Cyp4p1, Mocs1
subtype	γm+d	enriched	CG1631, Myo81F, zfh2
subtype	γm+d	depleted	norpA
subtype	α′/β′ap+m	enriched	Cyp4p1, Cyp4p2, Gadd45, Hsc70-3, Hsp70Bb, ImpL3
subtype	α′/β′ap+m	depleted	CG34351, SKIP
subtype	α′/β′m	enriched	CG11378, CG33639, Eaat1, Ets96B, LRP1, otp
subtype	α/βp	enriched	br, bru3, CG14459, CG18649, CG31323, CG43759, CG43795, CG46301, CG8785, disco-r, dl, IA-2, ind, kek2, LUBEL, Mhc, Rab23, rn, sls, Ten-m, Zasp52
subtype	α/βp	depleted	CG11566, CG1503, CG15539, CG15631, jdp, pre-lola-G, pre-mod(mdg4)-AD, pre-mod(mdg4)-Y, PVRAP, stg1, wry
subtype	α/βc	enriched	Tet
subtype	α/βc	depleted	CG18208
